# Supplementary material
Source: Springer Nature journal article supplement (https://www.springermedizin.de/resource/supplementary/12936_2009_1106_MOESM1_ESM.pdf/9549536)

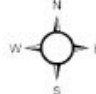

- Div. Sec. Divisions
- RM Rambewa
  - TR Thirappane
  - TL Thalawa
  - KK Kekirawa
  - GN Galnewa
  - EH Ehetuwewa
  - NW Nikaweratiya
  - WP Wariyapola
  - KB Kobeigane
  - WG Weerambagedara
  - PG Polgahawela
  - AL Alawwa
  - PN Pannala

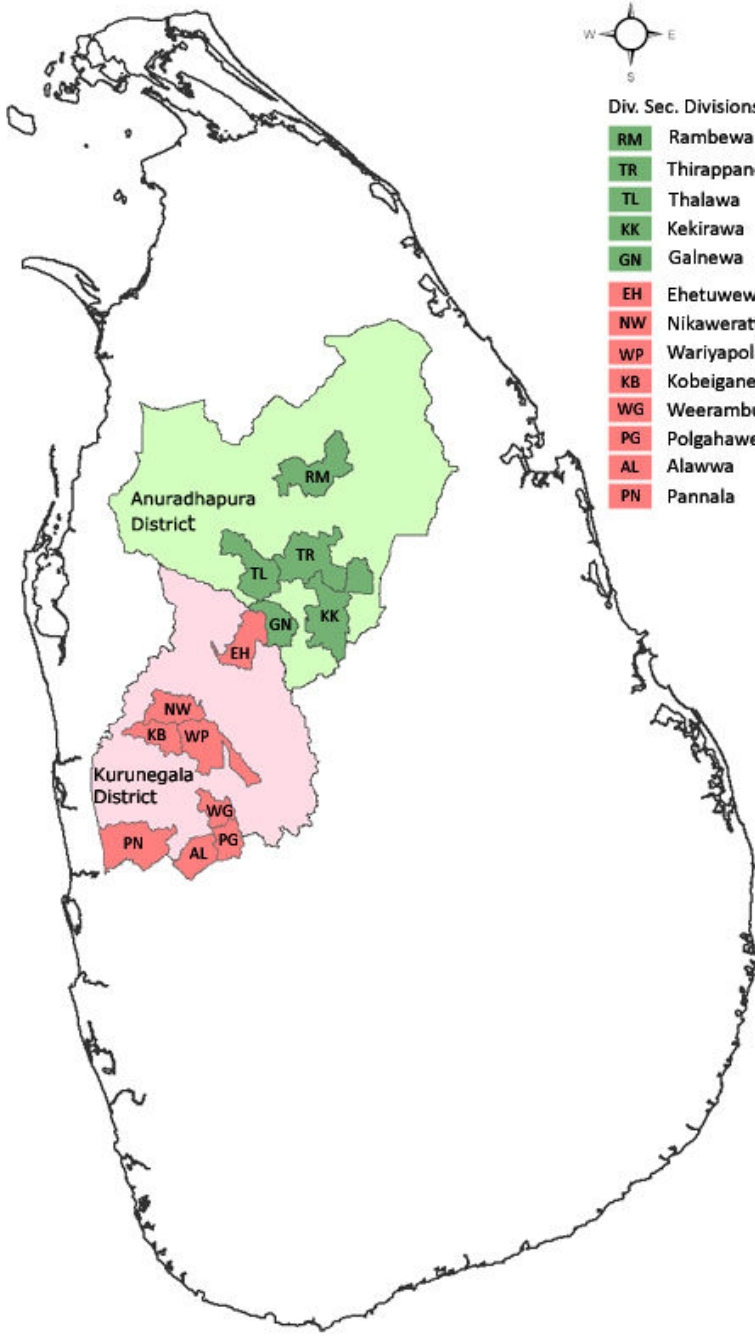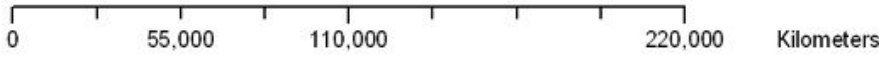

Supplement: MOESM1 [file 9549536]
